# Supplementary material for: Patterns of premenstrual syndrome in collegiate women: a cross-sectional study
Source: Research Square preprint supplement (doi:10.21203/rs.3.rs-1417729/v1), 2022-03-14
Supplement: Supplementary file 1 [file c73986955e1778f0666052d4.xlsx]

## Sheet: Supple figure 1
			No		Yes,		Yes, it affects
					but a little		my daily life
Breast Tenderness or Pain			□		□		□
Headache			□		□		□
Abdominal Bloating			□		□		□
Abdominal Pain			□		□		□
Swelling of Hands or Feet			□		□		□
Increased Appetite			□		□		□
Fatigability			□		□		□
Low Back Pain			□		□		□
Drowsiness			□		□		□
Skin Problems			□		□		□
Depression			□		□		□
Irritability			□		□		□
Confusion			□		□		□
Angry Outbursts			□		□		□
Anxiety			□		□		□
Social Withdrawal			□		□		□
Poor Concentration			□		□		□
Poor Motivation			□		□		□
